# Supplementary material for: The First Illumina-Based De Novo Transcriptome Sequencing and Analysis of Safflower Flowers
Source: PLoS One. 2012 Jun 19;7(6):e38653. doi: 10.1371/journal.pone.0038653 (PMC3378585; doi:10.1371/journal.pone.0038653)
Supplement: File S3 — The other flavonoid biosynthetic pathway-related genes and their coverages. (XLSX) [file pone.0038653.s003.xlsx]

## Sheet: Sheet1
Additional File 2 The other flavonoid biosynthetic pathway-related genes and their coverages.
Gene-ID	Subject_annotation	Depth	Coverage	Length	GC%	N%	Unique-mapped-Reads
Unigene4823_Safflower	1-aminocyclopropane-1-carboxylate oxidase; K05933 aminocyclopropanecarboxylate oxidase [EC:1.14.17.4]	8.8377	0.9599	499	0.4629	0	49
Unigene12466_Safflower	ACO1; 1-aminocyclopropane-1-carboxylate; K05933 aminocyclopropanecarboxylate oxidase [EC:1.14.17.4]	5.3754	0.4181	586	0.4249	0	35
Unigene94693_Safflower	ACO1; 1-aminocyclopropane-1-carboxylate; K05933 aminocyclopropanecarboxylate oxidase [EC:1.14.17.4]	19.1457	0.9899	597	0.4422	0	127
Unigene12467_Safflower	ACO2; 1-aminocyclopropane-1-carboxylate (EC:1.14.11.9); K05933 aminocyclopropanecarboxylate oxidase [EC:1.14.17.4]	0.5723	0.3672	629	0.3943	0	4
Unigene8092_Safflower	ACO2; 1-aminocyclopropane-1-carboxylate (EC:1.14.11.9); K05933 aminocyclopropanecarboxylate oxidase [EC:1.14.17.4]	17.8133	0.9922	1157	0.4702	0	229
Unigene10116_Safflower	ACO2; ACO2 (ACC OXIDASE 2); 1-aminocyclopropane-1-carboxylate oxidase (EC:1.14.11.9); K05933 aminocyclopropanecarboxylate oxidase [EC:1.14.17.4]	32.099	0.9334	586	0.4761	0	209
Unigene71589_Safflower	ACO3; 1-aminocyclopropane-1-carboxylate (EC:1.14.11.9); K05933 aminocyclopropanecarboxylate oxidase [EC:1.14.17.4]	13.758	0.9682	314	0.4777	0	48
Unigene24266_Safflower	ACO3; 1-aminocyclopropane-1-carboxylate (EC:1.14.11.9); K05933 aminocyclopropanecarboxylate oxidase [EC:1.14.17.4]	30.2251	0.94	1066	0.5863	0	358
Unigene27714_Safflower	ACO31, ZmACO31; acc oxidase; K05933 aminocyclopropanecarboxylate oxidase [EC:1.14.17.4]	51.1652	0.9949	781	0.5058	0	444
Unigene71590_Safflower	ACO4; 1-aminocyclopropane-1-carboxylate; K05933 aminocyclopropanecarboxylate oxidase [EC:1.14.17.4]	4.5608	0.8209	296	0.4899	0	15
Unigene92642_Safflower	ATGA2OX1 (gibberellin 2-oxidase 1); gibberellin 2-beta-dioxygenase; K04125 gibberellin 2-oxidase [EC:1.14.11.13]	5.7931	0.9885	435	0.4414	0	28
Unigene66473_Safflower	ATOMT1; ATOMT1 (O-METHYLTRANSFERASE 1); caffeate O-methyltransferase/ myricetin 3'-O-methyltransferase/ quercetin 3-O-methyltransferase; K05279 flavonol 3-O-methyltransferase [EC:2.1.1.76]	57.4869	0.9215	382	0.5838	0	244
Unigene96878_Safflower	bx6; benzoxazin6; K13229 2-oxoglutarate-dependent dioxygenase [EC:1.14.11.-]	92.2554	0.9976	838	0.5024	0	859
Unigene17157_Safflower	Bx7; O-methyltransferase BX7; K13230 O-methyltransferase [EC:2.1.1.-]	102.436	0.9602	1307	0.4147	0	1488
Unigene46469_Safflower	Bx7; O-methyltransferase BX7; K13230 O-methyltransferase [EC:2.1.1.-]	1230.8	0.9987	792	0.4646	0	10831
Unigene66812_Safflower	Bx7; O-methyltransferase BX7; K13230 O-methyltransferase [EC:2.1.1.-]	38.8193	0.9843	830	0.4108	0	358
Unigene95776_Safflower	Bx7; O-methyltransferase BX7; K13230 O-methyltransferase [EC:2.1.1.-]	5.873	0.933	567	0.4074	0	37
Unigene17704_Safflower	Bx7; O-methyltransferase BX7; K13230 O-methyltransferase [EC:2.1.1.-]	146.072	0.9605	886	0.4131	0	1438
Unigene93052_Safflower	Bx7; O-methyltransferase BX7; K13230 O-methyltransferase [EC:2.1.1.-]	7.0812	0.9949	394	0.4036	0	31
Unigene66951_Safflower	C4H; C4H (CINNAMATE-4-HYDROXYLASE); trans-cinnamate 4-monooxygenase (EC:1.14.13.11); K00487 trans-cinnamate 4-monooxygenase [EC:1.14.13.11]	54.4221	0.9883	597	0.3869	0	361
Unigene10052_Safflower	CAld5H/F5H1, CYP84A10; coniferylaldehyde 5- hydroxylase; K09755 ferulate-5-hydroxylase [EC:1.14.-.-]	246.748	0.9987	778	0.4023	0	2133
Unigene106530_Safflower	CAld5H/F5H1, CYP84A10; coniferylaldehyde 5- hydroxylase; K09755 ferulate-5-hydroxylase [EC:1.14.-.-]	16.2	0.9857	350	0.3457	0	63
Unigene10052_Safflower	CAld5H/F5H1, CYP84A10; coniferylaldehyde 5- hydroxylase; K09755 ferulate-5-hydroxylase [EC:1.14.-.-]	246.748	0.9987	778	0.4023	0	2133
Unigene100913_Safflower	CAld5H/F5H1, CYP84A10; coniferylaldehyde 5- hydroxylase; K09755 ferulate-5-hydroxylase [EC:1.14.-.-]	2.4901	0.9644	253	0.3755	0	7
Unigene73556_Safflower	CAld5H/F5H4; coniferylaldehyde 5- hydroxylase; K09755 ferulate-5-hydroxylase [EC:1.14.-.-]	8.9805	0.9523	461	0.3341	0	46
Unigene65953_Safflower	CAld5H/F5H4; coniferylaldehyde 5- hydroxylase; K09755 ferulate-5-hydroxylase [EC:1.14.-.-]	3.5019	0.9572	257	0.4708	0	10
Unigene16513_Safflower	CAM1; trans-caffeoyl-coa 3-o-methyltransferase (EC:2.1.1.104); K00588 caffeoyl-CoA O-methyltransferase [EC:2.1.1.104]	11.7	0.92	300	0.31	0	39
Unigene23494_Safflower	CCR1; CCR1 (CINNAMOYL COA REDUCTASE 1); cinnamoyl-CoA reductase (EC:1.2.1.44); K09753 cinnamoyl-CoA reductase [EC:1.2.1.44]	50.0329	0.9967	304	0.4507	0	169
Unigene102212_Safflower	CCR1; CCR1 (CINNAMOYL COA REDUCTASE 1); cinnamoyl-CoA reductase (EC:1.2.1.44); K09753 cinnamoyl-CoA reductase [EC:1.2.1.44]	3.7657	0.4979	239	0.4393	0	10
Unigene11644_Safflower	CCR2; CCR2 (CINNAMOYL COA REDUCTASE); cinnamoyl-CoA reductase; K09753 cinnamoyl-CoA reductase [EC:1.2.1.44]	43.3054	0.9958	239	0.4226	0	115
Unigene78929_Safflower	CCR2; CCR2 (CINNAMOYL COA REDUCTASE); cinnamoyl-CoA reductase; K09753 cinnamoyl-CoA reductase [EC:1.2.1.44]	1.2228	0.5109	368	0.4022	0	5
Unigene23198_Safflower	CCR2; CCR2 (CINNAMOYL COA REDUCTASE); cinnamoyl-CoA reductase; K09753 cinnamoyl-CoA reductase [EC:1.2.1.44]	11.363	0.462	697	0.4161	0	88
Unigene89886_Safflower	CCR2; CCR2 (CINNAMOYL COA REDUCTASE); cinnamoyl-CoA reductase; K09753 cinnamoyl-CoA reductase [EC:1.2.1.44]	22.0557	0.3682	861	0.374	0	211
Unigene89889_Safflower	CCR2; CCR2 (CINNAMOYL COA REDUCTASE); cinnamoyl-CoA reductase; K09753 cinnamoyl-CoA reductase [EC:1.2.1.44]	18.2567	0.5452	631	0.3693	0	128
Unigene11644_Safflower	CCR2; CCR2 (CINNAMOYL COA REDUCTASE); cinnamoyl-CoA reductase; K09753 cinnamoyl-CoA reductase [EC:1.2.1.44]	43.3054	0.9958	239	0.4226	0	115
Unigene23199_Safflower	cncr1, CCR; cinnamoyl CoA reductase1; K09753 cinnamoyl-CoA reductase [EC:1.2.1.44]	1.5591	0.3087	635	0.3921	0	11
Unigene46337_Safflower	comt; flavonoid O-methyltransferase; K05279 flavonol 3-O-methyltransferase [EC:2.1.1.76]	1212.54	0.9925	531	0.4407	0	7154
Unigene25638_Safflower	comt; flavonoid O-methyltransferase; K05279 flavonol 3-O-methyltransferase [EC:2.1.1.76]	385.805	0.9858	565	0.4726	0	2422
Unigene15799_Safflower	CYP705A3; electron carrier/ heme binding / iron ion binding / monooxygenase/ oxygen binding; K00517 [EC:1.14.-.-]	187.027	0.9986	730	0.3959	0	1517
Unigene92754_Safflower	CYP71A12 (cytochrome P450, family 71, subfamily A, polypeptide 12); electron carrier/ heme binding / iron ion binding / monooxygenase/ oxygen binding; K00517 [EC:1.14.-.-]	5.0147	0.9853	341	0.3578	0	19
Unigene93287_Safflower	CYP71A12 (cytochrome P450, family 71, subfamily A, polypeptide 12); electron carrier/ heme binding / iron ion binding / monooxygenase/ oxygen binding; K00517 [EC:1.14.-.-]	5.9124	0.8869	274	0.4161	0	18
Unigene35138_Safflower	CYP71A12 (cytochrome P450, family 71, subfamily A, polypeptide 12); electron carrier/ heme binding / iron ion binding / monooxygenase/ oxygen binding; K00517 [EC:1.14.-.-]	19.4148	0.9721	1145	0.441	0	247
Unigene102497_Safflower	CYP71A12 (cytochrome P450, family 71, subfamily A, polypeptide 12); electron carrier/ heme binding / iron ion binding / monooxygenase/ oxygen binding; K00517 [EC:1.14.-.-]	10.6221	0.9854	1093	0.473	0	129
Unigene42571_Safflower	CYP71A12 (cytochrome P450, family 71, subfamily A, polypeptide 12); electron carrier/ heme binding / iron ion binding / monooxygenase/ oxygen binding; K00517 [EC:1.14.-.-]	4.1516	0.6409	607	0.3904	0	28
Unigene97077_Safflower	CYP71A13 (cytochrome P450, family 71, subfamily A, polypeptide 13); indoleacetaldoxime dehydratase/ oxygen binding; K11868 cytochrome P450, family 71, subfamily A, polypeptide 13 (indoleacetaldoxime dehydratase) [EC:4.99.1.6]	196.397	0.9757	247	0.5506	0	539
Unigene1203_Safflower	CYP71A13 (cytochrome P450, family 71, subfamily A, polypeptide 13); indoleacetaldoxime dehydratase/ oxygen binding; K11868 cytochrome P450, family 71, subfamily A, polypeptide 13 (indoleacetaldoxime dehydratase) [EC:4.99.1.6]	160	0.9989	927	0.4725	0	1648
Unigene60260_Safflower	CYP71A14; electron carrier/ heme binding / iron ion binding / monooxygenase/ oxygen binding; K00517 [EC:1.14.-.-]	39.3976	0.988	249	0.4618	0	109
Unigene60374_Safflower	CYP71A14; electron carrier/ heme binding / iron ion binding / monooxygenase/ oxygen binding; K00517 [EC:1.14.-.-]	67.9134	0.9829	762	0.5564	0	575
Unigene117271_Safflower	CYP71A14; electron carrier/ heme binding / iron ion binding / monooxygenase/ oxygen binding; K00517 [EC:1.14.-.-]	6.2791	0.8977	215	0.4605	0	15
Unigene109749_Safflower	CYP71A16; electron carrier/ heme binding / iron ion binding / monooxygenase/ oxygen binding; K00517 [EC:1.14.-.-]	3.8434	0.8719	281	0.4591	0	12
Unigene69756_Safflower	CYP71A18; electron carrier/ heme binding / iron ion binding / monooxygenase/ oxygen binding; K00517 [EC:1.14.-.-]	5.799	0.9613	388	0.3943	0	25
Unigene79717_Safflower	CYP71A18; electron carrier/ heme binding / iron ion binding / monooxygenase/ oxygen binding; K00517 [EC:1.14.-.-]	43.238	0.9563	664	0.5949	0	319
Unigene83970_Safflower	CYP71A20; electron carrier/ heme binding / iron ion binding / monooxygenase/ oxygen binding; K00517 [EC:1.14.-.-]	3.1274	0.9884	259	0.444	0	9
Unigene107943_Safflower	CYP71B10; electron carrier/ heme binding / iron ion binding / monooxygenase/ oxygen binding; K00517 [EC:1.14.-.-]	139.439	0.9775	1376	0.4092	0	2134
Unigene105271_Safflower	CYP71B10; electron carrier/ heme binding / iron ion binding / monooxygenase/ oxygen binding; K00517 [EC:1.14.-.-]	483.636	0.9899	198	0.3939	0	1064
Unigene79216_Safflower	CYP71B11; electron carrier/ heme binding / iron ion binding / monooxygenase/ oxygen binding; K00517 [EC:1.14.-.-]	12.8571	0.8528	231	0.3766	0	33
Unigene26113_Safflower	CYP71B12; electron carrier/ heme binding / iron ion binding / monooxygenase/ oxygen binding; K00517 [EC:1.14.-.-]	5.8562	0.9795	292	0.4452	0	19
Unigene11911_Safflower	CYP71B12; electron carrier/ heme binding / iron ion binding / monooxygenase/ oxygen binding; K00517 [EC:1.14.-.-]	131.177	0.9978	459	0.3813	0	669
Unigene36368_Safflower	CYP71B12; electron carrier/ heme binding / iron ion binding / monooxygenase/ oxygen binding; K00517 [EC:1.14.-.-]	10.5288	0.9636	1456	0.4725	0	171
Unigene58836_Safflower	CYP71B13; electron carrier/ heme binding / iron ion binding / monooxygenase/ oxygen binding; K00517 [EC:1.14.-.-]	111.197	0.9981	518	0.4595	0	640
Unigene25864_Safflower	CYP71B14; electron carrier/ heme binding / iron ion binding / monooxygenase/ oxygen binding; K00517 [EC:1.14.-.-]	56.9033	0.4382	1262	0.4223	0	798
Unigene24011_Safflower	CYP71B16; electron carrier/ heme binding / iron ion binding / monooxygenase/ oxygen binding; K00517 [EC:1.14.-.-]	35.0649	0.9567	231	0.4156	0	90
Unigene88096_Safflower	CYP71B19; electron carrier/ heme binding / iron ion binding / monooxygenase/ oxygen binding; K00517 [EC:1.14.-.-]	8.2067	0.9058	329	0.4286	0	30
Unigene25330_Safflower	CYP71B21; electron carrier/ heme binding / iron ion binding / monooxygenase/ oxygen binding; K00517 [EC:1.14.-.-]	51.7347	0.9694	294	0.4354	0	169
Unigene50002_Safflower	CYP71B21; electron carrier/ heme binding / iron ion binding / monooxygenase/ oxygen binding; K00517 [EC:1.14.-.-]	7.2241	0.99	299	0.4916	0	24
Unigene93350_Safflower	CYP71B21; electron carrier/ heme binding / iron ion binding / monooxygenase/ oxygen binding; K00517 [EC:1.14.-.-]	4.9893	0.936	469	0.4712	0	26
Unigene11404_Safflower	CYP71B21; electron carrier/ heme binding / iron ion binding / monooxygenase/ oxygen binding; K00517 [EC:1.14.-.-]	422.975	0.9725	363	0.3967	0	1706
Unigene72049_Safflower	CYP71B23; electron carrier/ heme binding / iron ion binding / monooxygenase/ oxygen binding; K00517 [EC:1.14.-.-]	3.6096	0.9225	374	0.5749	0	15
Unigene120396_Safflower	CYP71B25; electron carrier/ heme binding / iron ion binding / monooxygenase/ oxygen binding; K00517 [EC:1.14.-.-]	1.7419	0.7032	155	0.5677	0	3
Unigene30019_Safflower	CYP71B25; electron carrier/ heme binding / iron ion binding / monooxygenase/ oxygen binding; K00517 [EC:1.14.-.-]	1.0526	0.5263	171	0.5556	0	2
Unigene17478_Safflower	CYP71B25; electron carrier/ heme binding / iron ion binding / monooxygenase/ oxygen binding; K00517 [EC:1.14.-.-]	15.7205	0.369	916	0.4159	0	160
Unigene65437_Safflower	CYP71B25; electron carrier/ heme binding / iron ion binding / monooxygenase/ oxygen binding; K00517 [EC:1.14.-.-]	3.7649	0.9303	502	0.4024	0	21
Unigene1713_Safflower	CYP71B26; electron carrier/ heme binding / iron ion binding / monooxygenase/ oxygen binding; K00517 [EC:1.14.-.-]	43.2659	0.9855	1038	0.5019	0	499
Unigene69496_Safflower	CYP71B26; electron carrier/ heme binding / iron ion binding / monooxygenase/ oxygen binding; K00517 [EC:1.14.-.-]	6.311	0.9284	656	0.4192	0	46
Unigene54371_Safflower	CYP71B28; electron carrier/ heme binding / iron ion binding / monooxygenase/ oxygen binding; K00517 [EC:1.14.-.-]	4.7507	0.8035	341	0.393	0	18
Unigene93968_Safflower	CYP71B28; electron carrier/ heme binding / iron ion binding / monooxygenase/ oxygen binding; K00517 [EC:1.14.-.-]	14.0111	0.9936	1259	0.4273	0	196
Unigene17477_Safflower	CYP71B3; electron carrier/ heme binding / iron ion binding / monooxygenase/ oxygen binding; K00517 [EC:1.14.-.-]	4.9106	0.4526	1118	0.3909	0	61
Unigene92529_Safflower	CYP71B3; electron carrier/ heme binding / iron ion binding / monooxygenase/ oxygen binding; K00517 [EC:1.14.-.-]	2.3226	0.8323	155	0.4	0	4
Unigene4245_Safflower	CYP71B3; electron carrier/ heme binding / iron ion binding / monooxygenase/ oxygen binding; K00517 [EC:1.14.-.-]	14.4958	0.2879	1775	0.5132	0	286
Unigene103902_Safflower	CYP71B30P; electron carrier/ heme binding / iron ion binding / monooxygenase/ oxygen binding; K00517 [EC:1.14.-.-]	69.8182	0.9879	330	0.5061	0	256
Unigene104057_Safflower	CYP71B31; electron carrier/ heme binding / iron ion binding / monooxygenase/ oxygen binding; K00517 [EC:1.14.-.-]	401.864	0.9981	531	0.371	0	2371
Unigene115774_Safflower	CYP71B31; electron carrier/ heme binding / iron ion binding / monooxygenase/ oxygen binding; K00517 [EC:1.14.-.-]	3.4783	0.8841	207	0.4734	0	8
Unigene94324_Safflower	CYP71B34; electron carrier/ heme binding / iron ion binding / monooxygenase/ oxygen binding; K00517 [EC:1.14.-.-]	15.0523	0.9477	287	0.5645	0	48
Unigene26636_Safflower	CYP71B34; electron carrier/ heme binding / iron ion binding / monooxygenase/ oxygen binding; K00517 [EC:1.14.-.-]	284.284	0.9958	712	0.3933	0	2249
Unigene77071_Safflower	CYP71B35; electron carrier/ heme binding / iron ion binding / monooxygenase/ oxygen binding; K00517 [EC:1.14.-.-]	3.9648	0.8634	227	0.4097	0	10
Unigene52756_Safflower	CYP71B35; electron carrier/ heme binding / iron ion binding / monooxygenase/ oxygen binding; K00517 [EC:1.14.-.-]	1.7787	0.8656	253	0.4269	0	5
Unigene42225_Safflower	CYP71B35; electron carrier/ heme binding / iron ion binding / monooxygenase/ oxygen binding; K00517 [EC:1.14.-.-]	5.819	0.819	464	0.4095	0	30
Unigene25865_Safflower	CYP71B38; electron carrier/ heme binding / iron ion binding / monooxygenase/ oxygen binding; K00517 [EC:1.14.-.-]	0.4274	0.1477	1198	0.4366	0	6
Unigene69417_Safflower	CYP71B4; electron carrier/ heme binding / iron ion binding / monooxygenase/ oxygen binding; K00517 [EC:1.14.-.-]	5.864	0.9178	353	0.4079	0	23
Unigene101352_Safflower	CYP71B5 (CYTOCHROME P450 71B5); electron carrier/ heme binding / iron ion binding / monooxygenase/ oxygen binding; K00517 [EC:1.14.-.-]	2.3438	0.8906	192	0.5104	0	5
Unigene2223_Safflower	CYP71B5 (CYTOCHROME P450 71B5); electron carrier/ heme binding / iron ion binding / monooxygenase/ oxygen binding; K00517 [EC:1.14.-.-]	32.6559	0.9975	802	0.5436	0	291
Unigene25331_Safflower	CYP71B5 (CYTOCHROME P450 71B5); electron carrier/ heme binding / iron ion binding / monooxygenase/ oxygen binding; K00517 [EC:1.14.-.-]	265.495	0.8999	819	0.3858	0	2416
Unigene104719_Safflower	CYP73A43, C4H1; cytochrome P450 (EC:1.14.13.11); K00487 trans-cinnamate 4-monooxygenase [EC:1.14.13.11]	267.536	0.9715	913	0.5192	0	2714
Unigene5669_Safflower	CYP75A13; cytochrome P450 flavonoid 3',5'-hydroxylase (EC:1.14.13.88); K13083 cytochrome P450, family 75, subfamily A (flavonoid 3',5'-hydroxylase) [EC:1.14.13.88]	6.5693	0.9964	274	0.3431	0	20
Unigene117304_Safflower	CYP75A13; cytochrome P450 flavonoid 3',5'-hydroxylase (EC:1.14.13.88); K13083 cytochrome P450, family 75, subfamily A (flavonoid 3',5'-hydroxylase) [EC:1.14.13.88]	88.2387	0.9706	511	0.4344	0	501
Unigene67700_Safflower	CYP75A13; cytochrome P450 flavonoid 3',5'-hydroxylase (EC:1.14.13.88); K13083 cytochrome P450, family 75, subfamily A (flavonoid 3',5'-hydroxylase) [EC:1.14.13.88]	49.0909	0.9633	627	0.4306	0	342
Unigene74577_Safflower	CYP76G1; electron carrier/ heme binding / iron ion binding / monooxygenase/ oxygen binding; K00517 [EC:1.14.-.-]	9.9519	0.9567	208	0.4375	0	23
Unigene7316_Safflower	CYP77B1; electron carrier/ heme binding / iron ion binding / monooxygenase/ oxygen binding; K00517 [EC:1.14.-.-]	3.4177	0.8323	316	0.4304	0	12
Unigene91349_Safflower	CYP78A5; electron carrier/ heme binding / iron ion binding / monooxygenase/ oxygen binding; K00517 [EC:1.14.-.-]	12.3139	0.996	497	0.5111	0	68
Unigene28708_Safflower	CYP79B2; electron carrier/ heme binding / iron ion binding / monooxygenase/ oxygen binding; K11812 cytochrome P450, family 79, subfamily B, polypeptide 2 [EC:1.14.13.-]	66.9151	0.9584	577	0.4246	0	429
Unigene4712_Safflower	CYP81D3; electron carrier/ heme binding / iron ion binding / monooxygenase/ oxygen binding; K00517 [EC:1.14.-.-]	28.3619	0.8112	641	0.4259	0	202
Unigene7448_Safflower	CYP81D4; electron carrier/ heme binding / iron ion binding / monooxygenase/ oxygen binding; K00517 [EC:1.14.-.-]	4.9147	0.8874	293	0.3959	0	16
Unigene74460_Safflower	CYP81D4; electron carrier/ heme binding / iron ion binding / monooxygenase/ oxygen binding; K00517 [EC:1.14.-.-]	9.0773	0.9979	466	0.4249	0	47
Unigene95677_Safflower	CYP81D8; electron carrier/ heme binding / iron ion binding / monooxygenase/ oxygen binding; K00517 [EC:1.14.-.-]	7.2386	0.9946	373	0.4718	0	30
Unigene44557_Safflower	CYP81F2; electron carrier/ heme binding / iron ion binding / monooxygenase/ oxygen binding; K00517 [EC:1.14.-.-]	1.4062	0.875	256	0.5508	0	4
Unigene25790_Safflower	CYP81F4; electron carrier/ heme binding / iron ion binding / monooxygenase/ oxygen binding; K00517 [EC:1.14.-.-]	15.4286	0.8122	490	0.4796	0	84
Unigene102031_Safflower	CYP81H1; electron carrier/ heme binding / iron ion binding / monooxygenase/ oxygen binding; K00517 [EC:1.14.-.-]	13.6486	0.9985	666	0.455	0	101
Unigene4038_Safflower	CYP81H1; electron carrier/ heme binding / iron ion binding / monooxygenase/ oxygen binding; K00517 [EC:1.14.-.-]	71.944	0.9984	643	0.4292	0	514
Unigene29493_Safflower	CYP81H1; electron carrier/ heme binding / iron ion binding / monooxygenase/ oxygen binding; K00517 [EC:1.14.-.-]	59.7127	0.9891	731	0.4159	0	485
Unigene91993_Safflower	CYP91A2 (CYTOCHROME P450 MONOOXYGENASE 91A2); electron carrier/ heme binding / iron ion binding / monooxygenase/ oxygen binding; K00517 [EC:1.14.-.-]	12.4752	0.9868	303	0.5116	0	42
Unigene8718_Safflower	CYP98A8; electron carrier/ heme binding / iron ion binding / monooxygenase/ oxygen binding; K09754 p-coumarate 3-hydroxylase [EC:1.14.13.-]	10.1687	0.953	1363	0.4321	0	154
Unigene6245_Safflower	CYP98A8; electron carrier/ heme binding / iron ion binding / monooxygenase/ oxygen binding; K09754 p-coumarate 3-hydroxylase [EC:1.14.13.-]	6.9718	0.6972	710	0.4451	0	55
Unigene15153_Safflower	FAH1; FAH1 (FERULIC ACID 5-HYDROXYLASE 1); ferulate 5-hydroxylase/ monooxygenase; K09755 ferulate-5-hydroxylase [EC:1.14.-.-]	5.4545	0.9293	198	0.4798	0	12
Unigene38744_Safflower	FAH1; FAH1 (FERULIC ACID 5-HYDROXYLASE 1); ferulate 5-hydroxylase/ monooxygenase; K09755 ferulate-5-hydroxylase [EC:1.14.-.-]	4.3085	0.9255	188	0.4734	0	9
Unigene4404_Safflower	FAH1; FAH1 (FERULIC ACID 5-HYDROXYLASE 1); ferulate 5-hydroxylase/ monooxygenase; K09755 ferulate-5-hydroxylase [EC:1.14.-.-]	98.6055	0.8667	1313	0.4501	0	1439
Unigene11559_Safflower	GA20OX1; gibberellin 20-oxidase (EC:1.14.11.12); K05282 gibberellin 20-oxidase [EC:1.14.11.12]	14.1256	0.9238	223	0.4126	0	35
Unigene35546_Safflower	GA20OX1; gibberellin 20-oxidase (EC:1.14.11.12); K05282 gibberellin 20-oxidase [EC:1.14.11.12]	20.4435	0.9852	744	0.4194	0	169
Unigene59949_Safflower	GA3OX2; GA3OX2 (GIBBERELLIN 3-OXIDASE 2); gibberellin 3-beta-dioxygenase (EC:1.14.11.15); K04124 gibberellin 3-beta-dioxygenase [EC:1.14.11.15]	88.4308	0.9703	975	0.4154	0	958
Unigene45259_Safflower	gibberellin 20-oxidase; K05282 gibberellin 20-oxidase [EC:1.14.11.12]	864.609	0.9635	384	0.5417	0	3689
Unigene104347_Safflower	gpm105; LOC100194386; K13065 shikimate O-hydroxycinnamoyltransferase [EC:2.3.1.133]	346.39	0.9984	615	0.5089	0	2367
Unigene97840_Safflower	gpm105; LOC100194386; K13065 shikimate O-hydroxycinnamoyltransferase [EC:2.3.1.133]	242.416	0.9978	894	0.5291	0	2408
Unigene8035_Safflower	gpm105; LOC100194386; K13065 shikimate O-hydroxycinnamoyltransferase [EC:2.3.1.133]	17.4431	0.9945	1099	0.4049	0	213
Unigene46463_Safflower	gpm105; LOC100194386; K13065 shikimate O-hydroxycinnamoyltransferase [EC:2.3.1.133]	610.733	0.9986	696	0.4397	0	4723
Unigene6699_Safflower	gpm105; LOC100194386; K13065 shikimate O-hydroxycinnamoyltransferase [EC:2.3.1.133]	70.1714	0.967	817	0.4725	0	637
Unigene91694_Safflower	gpm105; LOC100194386; K13065 shikimate O-hydroxycinnamoyltransferase [EC:2.3.1.133]	9.4264	0.8753	401	0.586	0	42
Unigene2901_Safflower	HCQ2; hydroxycinnamoyl CoA shikimate/quinate hydroxycinnamoyltransferase (EC:2.3.1.133); K13065 shikimate O-hydroxycinnamoyltransferase [EC:2.3.1.133]	335.808	0.9972	1064	0.4445	0	3970
Unigene106443_Safflower	HCQ2; hydroxycinnamoyl CoA shikimate/quinate hydroxycinnamoyltransferase (EC:2.3.1.133); K13065 shikimate O-hydroxycinnamoyltransferase [EC:2.3.1.133]	89.491	0.9966	884	0.4615	0	879
Unigene653_Safflower	HCQ2; hydroxycinnamoyl CoA shikimate/quinate hydroxycinnamoyltransferase (EC:2.3.1.133); K13065 shikimate O-hydroxycinnamoyltransferase [EC:2.3.1.133]	171.806	0.9947	1311	0.5492	0	2503
Unigene89958_Safflower	HCQ2; hydroxycinnamoyl CoA shikimate/quinate hydroxycinnamoyltransferase (EC:2.3.1.133); K13065 shikimate O-hydroxycinnamoyltransferase [EC:2.3.1.133]	136.603	0.9712	730	0.4589	0	1108
Unigene94180_Safflower	HCQ2; hydroxycinnamoyl CoA shikimate/quinate hydroxycinnamoyltransferase (EC:2.3.1.133); K13065 shikimate O-hydroxycinnamoyltransferase [EC:2.3.1.133]	23.961	0.9459	462	0.619	0	123
Unigene13058_Safflower	HCQ2; hydroxycinnamoyl CoA shikimate/quinate hydroxycinnamoyltransferase (EC:2.3.1.133); K13065 shikimate O-hydroxycinnamoyltransferase [EC:2.3.1.133]	19.2226	0.9812	1222	0.5147	0	261
Unigene97834_Safflower	HCQ2; hydroxycinnamoyl CoA shikimate/quinate hydroxycinnamoyltransferase (EC:2.3.1.133); K13065 shikimate O-hydroxycinnamoyltransferase [EC:2.3.1.133]	314.017	0.9913	229	0.4323	0	799
Unigene112499_Safflower	HCQ2; hydroxycinnamoyl CoA shikimate/quinate hydroxycinnamoyltransferase (EC:2.3.1.133); K13065 shikimate O-hydroxycinnamoyltransferase [EC:2.3.1.133]	41.3478	0.9928	690	0.4261	0	317
Unigene104785_Safflower	HCQ2; hydroxycinnamoyl CoA shikimate/quinate hydroxycinnamoyltransferase (EC:2.3.1.133); K13065 shikimate O-hydroxycinnamoyltransferase [EC:2.3.1.133]	126.909	0.9518	851	0.4571	0	1200
Unigene12076_Safflower	HCQ2; hydroxycinnamoyl CoA shikimate/quinate hydroxycinnamoyltransferase (EC:2.3.1.133); K13065 shikimate O-hydroxycinnamoyltransferase [EC:2.3.1.133]	67.7856	0.969	709	0.591	0	534
Unigene1507_Safflower	HCQ2; hydroxycinnamoyl CoA shikimate/quinate hydroxycinnamoyltransferase (EC:2.3.1.133); K13065 shikimate O-hydroxycinnamoyltransferase [EC:2.3.1.133]	236.932	0.9981	528	0.5587	0	1390
Unigene3457_Safflower	HCQ2; hydroxycinnamoyl CoA shikimate/quinate hydroxycinnamoyltransferase (EC:2.3.1.133); K13065 shikimate O-hydroxycinnamoyltransferase [EC:2.3.1.133]	16.4423	0.9808	208	0.5913	0	38
Unigene75072_Safflower	HCQ2; hydroxycinnamoyl CoA shikimate/quinate hydroxycinnamoyltransferase (EC:2.3.1.133); K13065 shikimate O-hydroxycinnamoyltransferase [EC:2.3.1.133]	14.4585	0.9765	554	0.4982	0	89
Unigene75932_Safflower	HCQ2; hydroxycinnamoyl CoA shikimate/quinate hydroxycinnamoyltransferase (EC:2.3.1.133); K13065 shikimate O-hydroxycinnamoyltransferase [EC:2.3.1.133]	6.4965	0.9225	568	0.5739	0	41
Unigene59083_Safflower	HCQ2; hydroxycinnamoyl CoA shikimate/quinate hydroxycinnamoyltransferase (EC:2.3.1.133); K13065 shikimate O-hydroxycinnamoyltransferase [EC:2.3.1.133]	94.8718	0.9915	351	0.5242	0	370
Unigene77332_Safflower	HCQ7; hydroxycinnamoyl CoA shikimate/quinate hydroxycinnamoyltransferase (EC:2.3.1.133); K13065 shikimate O-hydroxycinnamoyltransferase [EC:2.3.1.133]	2.5281	0.9298	712	0.5562	0	20
Unigene23721_Safflower	HCQ7; hydroxycinnamoyl CoA shikimate/quinate hydroxycinnamoyltransferase (EC:2.3.1.133); K13065 shikimate O-hydroxycinnamoyltransferase [EC:2.3.1.133]	28.8538	0.9718	602	0.4801	0	193
Unigene106471_Safflower	HCT; HCT (HYDROXYCINNAMOYL-COA SHIKIMATE/QUINATE HYDROXYCINNAMOYL TRANSFERASE); quinate O-hydroxycinnamoyltransferase/ shikimate O-hydroxycinnamoyltransferase/ transferase (EC:2.3.1.133); K13065 shikimate O-hydroxycinnamoyltransferase [EC:2.3.1.133]	23.7662	0.9784	231	0.5325	0	61
Unigene8287_Safflower	HCT; HCT (HYDROXYCINNAMOYL-COA SHIKIMATE/QUINATE HYDROXYCINNAMOYL TRANSFERASE); quinate O-hydroxycinnamoyltransferase/ shikimate O-hydroxycinnamoyltransferase/ transferase (EC:2.3.1.133); K13065 shikimate O-hydroxycinnamoyltransferase [EC:2.3.1.133]	359.926	0.7446	1214	0.4761	0	4855
Unigene8288_Safflower	HCT; HCT (HYDROXYCINNAMOYL-COA SHIKIMATE/QUINATE HYDROXYCINNAMOYL TRANSFERASE); quinate O-hydroxycinnamoyltransferase/ shikimate O-hydroxycinnamoyltransferase/ transferase (EC:2.3.1.133); K13065 shikimate O-hydroxycinnamoyltransferase [EC:2.3.1.133]	49.1044	0.6007	1217	0.4725	0	664
Unigene78450_Safflower	indole-3-acetate beta-glucosyltransferase (EC:2.4.1.121); K13691 pathogen-inducible salicylic acid glucosyltransferase [EC:2.4.1.-]	6.8182	0.9432	264	0.6515	0	20
Unigene78450_Safflower	indole-3-acetate beta-glucosyltransferase (EC:2.4.1.121); K13691 pathogen-inducible salicylic acid glucosyltransferase [EC:2.4.1.-]	6.8182	0.9432	264	0.6515	0	20
Unigene71423_Safflower	MGC53924 protein (ISS); K00545 catechol O-methyltransferase [EC:2.1.1.6]	26.129	0.9845	837	0.4253	0	243
Unigene98950_Safflower	NRPB1; NRPB1 (RNA POLYMERASE II LARGE SUBUNIT); DNA binding / DNA-directed RNA polymerase; K03006 DNA-directed RNA polymerase II subunit RPB1 [EC:2.7.7.6]	216.719	0.9951	1229	0.5753	0	2960
Unigene4629_Safflower	O-methyltransferase (EC:2.1.1.104); K00588 caffeoyl-CoA O-methyltransferase [EC:2.1.1.104]	38.6457	0.5012	1211	0.417	0	520
Unigene576_Safflower	O-methyltransferase (EC:2.1.1.104); K00588 caffeoyl-CoA O-methyltransferase [EC:2.1.1.104]	43.3802	0.5724	1139	0.4311	0	549
Unigene18585_Safflower	O-methyltransferase (EC:2.1.1.104); K00588 caffeoyl-CoA O-methyltransferase [EC:2.1.1.104]	3.3129	0.9264	163	0.3865	0	6
Unigene18691_Safflower	O-methyltransferase (EC:2.1.1.104); K00588 caffeoyl-CoA O-methyltransferase [EC:2.1.1.104]	13.1351	0.9622	185	0.427	0	27
Unigene215_Safflower	O-methyltransferase (EC:2.1.1.104); K00588 caffeoyl-CoA O-methyltransferase [EC:2.1.1.104]	316.578	0.98	1198	0.4124	0	4214
Unigene9409_Safflower	O-methyltransferase (EC:2.1.1.104); K00588 caffeoyl-CoA O-methyltransferase [EC:2.1.1.104]	180.147	0.6036	1226	0.4274	0	2454
Unigene10183_Safflower	O-methyltransferase (EC:2.1.1.104); K00588 caffeoyl-CoA O-methyltransferase [EC:2.1.1.104]	6.6892	0.973	444	0.4234	0	33
Unigene68587_Safflower	O-methyltransferase (EC:2.1.1.104); K00588 caffeoyl-CoA O-methyltransferase [EC:2.1.1.104]	5.625	0.9946	368	0.4076	0	23
Unigene76090_Safflower	O-methyltransferase (EC:2.1.1.104); K00588 caffeoyl-CoA O-methyltransferase [EC:2.1.1.104]	4.0909	0.9026	154	0.4416	0	7
Unigene17665_Safflower	O-methyltransferase (EC:2.1.1.104); K00588 caffeoyl-CoA O-methyltransferase [EC:2.1.1.104]	76.4529	0.4228	764	0.4332	0	649
Unigene52096_Safflower	O-methyltransferase (EC:2.1.1.104); K00588 caffeoyl-CoA O-methyltransferase [EC:2.1.1.104]	6.8456	0.9821	894	0.4351	0	68
Unigene50807_Safflower	O-methyltransferase (EC:2.1.1.104); K00588 caffeoyl-CoA O-methyltransferase [EC:2.1.1.104]	7.2857	0.9952	630	0.4349	0	51
Unigene102124_Safflower	Os02g0611800; K13065 shikimate O-hydroxycinnamoyltransferase [EC:2.3.1.133]	10.3878	0.9945	1083	0.4404	0	125
Unigene7732_Safflower	Os02g0611800; K13065 shikimate O-hydroxycinnamoyltransferase [EC:2.3.1.133]	121.968	0.9328	625	0.4912	0	847
Unigene103108_Safflower	Os02g0611800; K13065 shikimate O-hydroxycinnamoyltransferase [EC:2.3.1.133]	12.2004	0.9646	509	0.5756	0	69
Unigene112444_Safflower	Os02g0771600; K05933 aminocyclopropanecarboxylate oxidase [EC:1.14.17.4]	15.782	0.9463	633	0.5229	0	111
Unigene104843_Safflower	Os03g0112900; K09755 ferulate-5-hydroxylase [EC:1.14.-.-]	90.2256	0.99	399	0.4637	0	400
Unigene86999_Safflower	Os03g0112900; K09755 ferulate-5-hydroxylase [EC:1.14.-.-]	9.6085	0.7758	281	0.4626	0	30
Unigene49464_Safflower	Os03g0112900; K09755 ferulate-5-hydroxylase [EC:1.14.-.-]	7.2386	0.9839	373	0.378	0	30
Unigene47519_Safflower	Os03g0112900; K09755 ferulate-5-hydroxylase [EC:1.14.-.-]	2.4161	0.9966	298	0.4866	0	8
Unigene23138_Safflower	Os03g0417700; K00517 [EC:1.14.-.-]	52.6056	0.9824	284	0.5669	0	166
Unigene23240_Safflower	Os03g0760200; K00517 [EC:1.14.-.-]	40.9822	0.9959	1460	0.4411	0	665
Unigene59035_Safflower	Os03g0760200; K00517 [EC:1.14.-.-]	16.9091	0.8303	165	0.4909	0	31
Unigene59036_Safflower	Os03g0760200; K00517 [EC:1.14.-.-]	35.4706	0.9471	170	0.4824	0	67
Unigene1173_Safflower	Os04g0500700; K13065 shikimate O-hydroxycinnamoyltransferase [EC:2.3.1.133]	138.427	0.9826	1495	0.4214	0	2300
Unigene11089_Safflower	Os04g0500700; K13065 shikimate O-hydroxycinnamoyltransferase [EC:2.3.1.133]	67.3109	0.4804	714	0.437	0	534
Unigene7037_Safflower	Os04g0500700; K13065 shikimate O-hydroxycinnamoyltransferase [EC:2.3.1.133]	1180.48	0.7534	807	0.4102	0	10585
Unigene7846_Safflower	Os04g0500700; K13065 shikimate O-hydroxycinnamoyltransferase [EC:2.3.1.133]	290.25	0.8105	760	0.3921	0	2451
Unigene7917_Safflower	Os04g0500700; K13065 shikimate O-hydroxycinnamoyltransferase [EC:2.3.1.133]	20.078	0.9875	641	0.4961	0	143
Unigene62770_Safflower	Os04g0500700; K13065 shikimate O-hydroxycinnamoyltransferase [EC:2.3.1.133]	19.2522	0.9896	575	0.3809	0	123
Unigene59870_Safflower	Os04g0500700; K13065 shikimate O-hydroxycinnamoyltransferase [EC:2.3.1.133]	3.7143	0.9714	315	0.5143	0	13
Unigene79582_Safflower	Os05g0149400; K05933 aminocyclopropanecarboxylate oxidase [EC:1.14.17.4]	37.4059	0.9986	717	0.5174	0	298
Unigene91852_Safflower	Os05g0151000; K03006 DNA-directed RNA polymerase II subunit RPB1 [EC:2.7.7.6]	7.329	0.8811	614	0.5993	0	50
Unigene25863_Safflower	Os05g0494000; K09754 p-coumarate 3-hydroxylase [EC:1.14.13.-]	22.7812	0.4031	960	0.4542	0	243
Unigene84992_Safflower	Os05g0494000; K09754 p-coumarate 3-hydroxylase [EC:1.14.13.-]	1.7822	0.9703	303	0.4719	0	6
Unigene17667_Safflower	Os06g0165800; K00588 caffeoyl-CoA O-methyltransferase [EC:2.1.1.104]	102.638	0.8809	235	0.4426	0	268
Unigene25927_Safflower	Os08g0157500; K05279 flavonol 3-O-methyltransferase [EC:2.1.1.76]	964.228	0.9985	667	0.4078	0	7146
Unigene26784_Safflower	Os08g0157500; K05279 flavonol 3-O-methyltransferase [EC:2.1.1.76]	296.387	0.9033	631	0.355	0	2078
Unigene26785_Safflower	Os08g0157500; K05279 flavonol 3-O-methyltransferase [EC:2.1.1.76]	731.808	0.92	625	0.3552	0	5082
Unigene2593_Safflower	Os09g0451000; K05933 aminocyclopropanecarboxylate oxidase [EC:1.14.17.4]	50.4573	0.9523	503	0.4493	0	282
Unigene2919_Safflower	Os09g0451000; K05933 aminocyclopropanecarboxylate oxidase [EC:1.14.17.4]	553.656	0.9735	982	0.4409	0	6041
Unigene46525_Safflower	Os09g0451400; K05933 aminocyclopropanecarboxylate oxidase [EC:1.14.17.4]	181.325	0.9827	1155	0.49	0	2327
Unigene59018_Safflower	Os09g0518200; K13691 pathogen-inducible salicylic acid glucosyltransferase [EC:2.4.1.-]	172.394	0.9982	568	0.3486	0	1088
Unigene25190_Safflower	Os10g0166600; K00517 [EC:1.14.-.-]	548.12	0.995	399	0.4712	0	2430
Unigene118894_Safflower	Os10g0166600; K00517 [EC:1.14.-.-]	2.3176	0.927	233	0.4464	0	6
Unigene23581_Safflower	Os10g0166600; K00517 [EC:1.14.-.-]	62.7202	0.9775	1158	0.4076	0	807
Unigene66823_Safflower	Os10g0512400; K09755 ferulate-5-hydroxylase [EC:1.14.-.-]	45.5196	0.9954	866	0.4642	0	438
Unigene30319_Safflower	Os10g0512400; K09755 ferulate-5-hydroxylase [EC:1.14.-.-]	77.5601	0.97	832	0.4303	0	717
Unigene45600_Safflower	Os11g0186900; K05933 aminocyclopropanecarboxylate oxidase [EC:1.14.17.4]	186.713	0.9674	429	0.4895	0	890
Unigene16010_Safflower	oxidoreductase, 2OG-Fe(II) oxygenase family protein; K06892	145.13	0.9697	462	0.4286	0	745
Unigene24265_Safflower	oxidoreductase, 2OG-Fe(II) oxygenase family protein; K06892	2.7577	0.6574	359	0.454	0	11
Unigene92924_Safflower	oxidoreductase, 2OG-Fe(II) oxygenase family protein; K06892	6.0577	0.9904	208	0.476	0	14
Unigene45631_Safflower	oxidoreductase, 2OG-Fe(II) oxygenase family protein; K06892	591.818	0.998	495	0.4949	0	3255
Unigene25683_Safflower	oxidoreductase, 2OG-Fe(II) oxygenase family protein; K06892	155.151	0.9978	891	0.5511	0	1536
Unigene98353_Safflower	probable NAD(P) dependent 3-beta-hydroxysteroid dehydrogenase; K07748 sterol-4alpha-carboxylate 3-dehydrogenase (decarboxylating) [EC:1.1.1.170]	99.7465	0.6221	868	0.424	0	962
Unigene60263_Safflower	PRR2; PRR2 (PINORESINOL REDUCTASE 2); pinoresinol reductase; K00224 [EC:1.3.1.-]	7.8807	0.4112	788	0.4162	0	69
Unigene40666_Safflower	PRR2; PRR2 (PINORESINOL REDUCTASE 2); pinoresinol reductase; K00224 [EC:1.3.1.-]	64.0741	0.9986	729	0.4047	0	519
Unigene78928_Safflower	terpene cyclase/mutase-related; K00091 dihydroflavonol-4-reductase [EC:1.1.1.219]	25.1674	0.776	1290	0.438	0	361
Unigene13971_Safflower	TIDP2701; LOC100279386; K13065 shikimate O-hydroxycinnamoyltransferase [EC:2.3.1.133]	14.2611	0.9993	1413	0.4586	0	224
Unigene55265_Safflower	TIDP2701; LOC100279386; K13065 shikimate O-hydroxycinnamoyltransferase [EC:2.3.1.133]	4.6698	0.908	424	0.5283	0	22
Unigene46956_Safflower	TIDP2701; LOC100279386; K13065 shikimate O-hydroxycinnamoyltransferase [EC:2.3.1.133]	249.213	0.9987	762	0.5289	0	2110
Unigene98844_Safflower	TIDP2701; LOC100279386; K13065 shikimate O-hydroxycinnamoyltransferase [EC:2.3.1.133]	230.566	0.9528	954	0.5556	0	2444
Unigene10741_Safflower	TIDP2701; LOC100279386; K13065 shikimate O-hydroxycinnamoyltransferase [EC:2.3.1.133]	14.5368	0.4715	842	0.3955	0	136
Unigene45665_Safflower	TIDP2907; LOC100191369; K00475 naringenin 3-dioxygenase [EC:1.14.11.9]	622.603	0.9977	438	0.3562	0	3030
Unigene43841_Safflower	trans-cinnamate 4-monooxygenase; K00487 trans-cinnamate 4-monooxygenase [EC:1.14.13.11]	1.2676	0.77	213	0.4225	0	3
Unigene86497_Safflower	UDP-glucose 4-epimerase; K01784 UDP-glucose 4-epimerase [EC:5.1.3.2]	8.3415	0.9073	615	0.4764	0	57
Unigene7139_Safflower	UGT74F2 (UDP-GLUCOSYLTRANSFERASE 74F2); UDP-glucose:4-aminobenzoate acylglucosyltransferase/ UDP-glucosyltransferase/ UDP-glycosyltransferase/ transferase, transferring glycosyl groups / transferase, transferring hexosyl groups; K13691 pathogen-inducible salicylic acid glucosyltransferase [EC:2.4.1.-]	57.0992	0.989	1815	0.4832	0	1153
Unigene25782_Safflower	UGT75B1 (UDP-GLUCOSYLTRANSFERASE 75B1); UDP-glucose:4-aminobenzoate acylglucosyltransferase/ UDP-glucosyltransferase/ UDP-glycosyltransferase/ abscisic acid glucosyltransferase/ transferase, transferring glycosyl groups; K13692 UDP-glucose:(indol-3-yl)acetate beta-D-glucosyltransferase [EC:2.4.1.121]	253.436	0.9264	489	0.3538	0	1377
Unigene72133_Safflower	UGT78D1 (UDP-GLUCOSYL TRANSFERASE 78D1); UDP-glycosyltransferase/ quercetin 3-O-glucosyltransferase/ transferase, transferring glycosyl groups; K00724 flavonol-3-O-glucoside L-rhamnosyltransferase [EC:2.4.1.159]	4.7191	0.8427	267	0.4307	0	14
Unigene43168_Safflower	UGT78D1 (UDP-GLUCOSYL TRANSFERASE 78D1); UDP-glycosyltransferase/ quercetin 3-O-glucosyltransferase/ transferase, transferring glycosyl groups; K00724 flavonol-3-O-glucoside L-rhamnosyltransferase [EC:2.4.1.159]	5.9406	0.9637	303	0.5116	0	20
Unigene60807_Safflower	UGT78D1 (UDP-GLUCOSYL TRANSFERASE 78D1); UDP-glycosyltransferase/ quercetin 3-O-glucosyltransferase/ transferase, transferring glycosyl groups; K00724 flavonol-3-O-glucoside L-rhamnosyltransferase [EC:2.4.1.159]	35.7627	0.9981	531	0.4407	0	211
Unigene72133_Safflower	UGT78D1 (UDP-GLUCOSYL TRANSFERASE 78D1); UDP-glycosyltransferase/ quercetin 3-O-glucosyltransferase/ transferase, transferring glycosyl groups; K00724 flavonol-3-O-glucoside L-rhamnosyltransferase [EC:2.4.1.159]	4.7191	0.8427	267	0.4307	0	14
Unigene43168_Safflower	UGT78D1 (UDP-GLUCOSYL TRANSFERASE 78D1); UDP-glycosyltransferase/ quercetin 3-O-glucosyltransferase/ transferase, transferring glycosyl groups; K00724 flavonol-3-O-glucoside L-rhamnosyltransferase [EC:2.4.1.159]	5.9406	0.9637	303	0.5116	0	20
Unigene60807_Safflower	UGT78D1 (UDP-GLUCOSYL TRANSFERASE 78D1); UDP-glycosyltransferase/ quercetin 3-O-glucosyltransferase/ transferase, transferring glycosyl groups; K00724 flavonol-3-O-glucoside L-rhamnosyltransferase [EC:2.4.1.159]	35.7627	0.9981	531	0.4407	0	211
Unigene104608_Safflower	UGT78D2 (UDP-GLUCOSYL TRANSFERASE 78D2); UDP-glycosyltransferase/ anthocyanidin 3-O-glucosyltransferase/ quercetin 3-O-glucosyltransferase/ transferase, transferring glycosyl groups; K10757 flavonol 3-O-glucosyltransferase [EC:2.4.1.91]	193.831	0.9978	462	0.3571	0	995
Unigene107679_Safflower	UGT84A2; UDP-glycosyltransferase/ sinapate 1-glucosyltransferase (EC:2.4.1.120); K13068 sinapate 1-glucosyltransferase [EC:2.4.1.120]	53.5039	0.9744	508	0.4783	0	302
Unigene107679_Safflower	UGT84A2; UDP-glycosyltransferase/ sinapate 1-glucosyltransferase (EC:2.4.1.120); K13068 sinapate 1-glucosyltransferase [EC:2.4.1.120]	53.5039	0.9744	508	0.4783	0	302
Unigene69189_Safflower	UGT84B2 (UDP-glucosyl transferase 84B2); UDP-glycosyltransferase/ abscisic acid glucosyltransferase/ transferase, transferring glycosyl groups; K13692 UDP-glucose:(indol-3-yl)acetate beta-D-glucosyltransferase [EC:2.4.1.121]	6.3093	0.9897	485	0.4619	0	34
