# Supplementary material for: The First Illumina-Based De Novo Transcriptome Sequencing and Analysis of Safflower Flowers
Source: PLoS One. 2012 Jun 19;7(6):e38653. doi: 10.1371/journal.pone.0038653 (PMC3378585; doi:10.1371/journal.pone.0038653)
Supplement: File S6 — The primers designed for qRT-PCR analysis. (XLS) [file pone.0038653.s006.xls]

## Sheet: Sheet1
Additional File 5 The primers designed for qRT-PCR analysis
CHS	unigene104011-f	GTCGTCCTCTTCGTTGTGGT
	unigene104011-r	CAAAGGCGAAAAGACGATTC
CHS	unigene96945-F	AAGCACAACGAGCAGAAGGT
	unigene96945-R	GCACATGTTGGGGTTCTCTT
CHI	unigene16741-F	ACGACAATCGGAGTTTCAGG
	unigene16741-R	GGGACCTATACCGATGCAGA
CHI	unigene27082-F	TCAGAAATGGTGATGGTGGA
	unigene27082-R	CGGTGCCGAAATAACAGAAT
F3H	unigene45665-F	AGAAAGGGGCAAAAATGTCC
	unigene45665-R	CGATTGTGTACCCGTTGAAA
F3H	unigene45631-F	AACGTGAGGTCAGGATGAGG
	unigene45631-R	CTCTCGTTGGCCTGATAAGC
F3'H	unigene104057-F	ACCCAATCGAATTGCTGAAC
	unigene104057-R	TCCCTCAAAATGCCCAAATA
F3'5'H	unigene25427-F	GTTTTTGCCATTCGGAGTTG
	unigene25427-R	TGGCTTCCTTTTCTTCGTCA
FLS	unigene29190-F	CCTTTGCGTCCAATAACCAT
	unigene29190-R	GCTTTGTGGTGTTCCACCTT
DFR	unigene98353-F	CCCAGATGGATGGTATGTCC
	unigene98353-R	CCACAACGAGAGGATGGATT
LAR	unigene25256-F	CGGAACCGGAGATTCTTGTA
	unigene25256-R	GGCGATGGAAATGTGAAAGT
3GT	unigene71390-F	TTCCGTCACAGGAATCACAA
	unigene71390-R	GGTTGGAAGAAAGGCACAAA
3GRT	unigene59018-F	CCAATGATTTGTTGGCCATT
	unigene59018-R	GATGAGCCAGAAGGAGATGC
ANS	unigene45108-F	CTCGGCAACTGGAAGAACTC
	unigene45108-R	CGACCAGTTCAGCAACGATA
S28	unigene82078-F	GGGTCCTTTCACGTTTCTGA
	unigene82078-R	GGCCTGACTTATCGGTAGCA
S25	unigene104038-F	GGAGGTTGAGGGAAAAGGAG
	unigene104038-R	GTGACCTCGTCACCCGTAGT
